# Supplementary material
Source: HighWire-hosted journal article supplement (https://dmd.aspetjournals.org/highwire/filestream/74938/field_highwire_adjunct_files/1/89367_Supplemental_Tables_1.xlsx)
Supplement: 89367_Supplemental_Tables_1.xlsx [file 89367_Supplemental_Tables_1.xlsx]

## Sheet: Suppl Table 1
Hepatic Transcript Profiles of Cytochromes P450 Genes Predict Sex Differences in Drug Metabolism
James C. Fuscoe, Vikrant Vijay, Joseph P. Hanig, Tao Han, Lijun Ren, James J. Greenhaw, Richard D. Beger, Lisa M. Pence, and Qiang Shi
Drug Metabolism and Disposition
Suppl Table 1. 336 DMET genes obtained from Pharmapendium and indication whether gene expression data is available in NCBI Gene Expression Omnibus database with accession GEO21335
Entrez Gene Symbol	Gene Expression Data Available
Abca1	Yes
Abcb11	Yes
Abcb1a	Yes
Abcb1b	Yes
Abcb4	Yes
Abcc1	Yes
Abcc10	Yes
Abcc2	Yes
Abcc3	Yes
Abcc4	Yes
Abcc5	Yes
Abcc6	Yes
Abcd1	Yes
Abcd2	Yes
Abcd3	Yes
Abcg1	Yes
Abcg2	Yes
Ache	Yes
Acp5	Yes
Ada	Yes
Adh1	Yes
Adh3	No
Adh4	Yes
Adh5	Yes
Adh6	Yes
Adh6a	Yes
Adh7	Yes
Akr1c1	Yes
Akr1c2	Yes
Akr1c3	Yes
Aldh16a1	Yes
Aldh18a1	Yes
Aldh1a1	Yes
Aldh1a2	Yes
Aldh1a3	Yes
Aldh1a7	Yes
Aldh1b1	Yes
Aldh1l1	Yes
Aldh1l2	Yes
Aldh2	Yes
Aldh3a1	Yes
Aldh3a2	Yes
Aldh3b1	Yes
Aldh3b2	Yes
Aldh4a1	Yes
Aldh5a1	Yes
Aldh6a1	Yes
Aldh7a1	Yes
Aldh8a1	Yes
Aldh9a1	Yes
Alpl	Yes
Aox1	Yes
Aox2	No
Aox3	Yes
Aox4	Yes
Arsa	Yes
Arsb	Yes
Arse	Yes
Arsg	Yes
Arsi	Yes
Arsj	Yes
Arsk	Yes
Bche	Yes
Car1	Yes
Car10	No
Car11	Yes
Car12	Yes
Car13	Yes
Car13-ps1	No
Car14	Yes
Car15	Yes
Car2	No
Car3	Yes
Car4	Yes
Car5a	Yes
Car5b	Yes
Car6	Yes
Car7	Yes
Car8	Yes
Car9	Yes
Cbr1	Yes
Cbr2	No
Cbr3	Yes
Cbr4	Yes
Cda	Yes
Ces1a	No
Ces1c	Yes
Ces1d	Yes
Ces1e	Yes
Ces1f	Yes
Ces2	No
Ces2a	Yes
Ces2c	Yes
Ces2e	Yes
Ces2g	Yes
Ces2h	Yes
Ces2i	No
Ces2j	No
Ces3a	No
Ces4a	Yes
Ces5a	Yes
Cesl1	Yes
Cmbl	Yes
Comt	Yes
Ctsa	Yes
Cyb5a	Yes
Cyp11b1	Yes
Cyp17a1	Yes
Cyp19a1	Yes
Cyp1a1	Yes
Cyp1a2	Yes
Cyp1b1	Yes
Cyp21a1	Yes
Cyp24a1	Yes
Cyp27a1	Yes
Cyp2a	No
Cyp2a1	Yes
Cyp2a2	Yes
Cyp2a3	Yes
Cyp2b1	Yes
Cyp2b15	Yes
Cyp2b2	Yes
Cyp2b3	Yes
Cyp2c11	Yes
Cyp2c12	Yes
Cyp2c13	Yes
Cyp2c24	No
Cyp2c6	No
Cyp2c6v1	Yes
Cyp2c7	Yes
Cyp2d1	No
Cyp2d2	Yes
Cyp2d3	Yes
Cyp2d4	Yes
Cyp2e1	Yes
Cyp2f4	Yes
Cyp2g1	Yes
Cyp2j4	Yes
Cyp3a18	Yes
Cyp3a2	Yes
Cyp3a23/3a1	Yes
Cyp3a62	Yes
Cyp3a9	Yes
Cyp4a1	Yes
Cyp4a2	Yes
Cyp4a3	Yes
Cyp4a8	Yes
Cyp4f1	Yes
Cyp4f18	No
Cyp4f6	Yes
Dck	Yes
Decr1	Yes
Dguok	Yes
Dhdh	Yes
Dhfr	Yes
Dpp4	Yes
Dpyd	Yes
Dpys	Yes
Elane	Yes
Elovl1	Yes
Elovl3	Yes
Ephx1	Yes
Ephx2	Yes
Ephx3	Yes
Ephx4	Yes
Fmo1	Yes
Fmo13	Yes
Fmo2	Yes
Fmo3	Yes
Fmo4	Yes
Fmo5	Yes
Fmo6	Yes
Fmo9	No
Gsr	Yes
Gsta1	No
Hsd11b1	Yes
Impdh1	Yes
Impdh2	Yes
Lat	Yes
Maoa	Yes
Maob	Yes
Mme	Yes
Mttp	Yes
Nat1	Yes
Nat10	No
Nat14	No
Nat2	Yes
Nat3	Yes
Nat8	Yes
Nat8b	Yes
Nat8l	Yes
Nat9	Yes
Natd1	No
Oat	Yes
Pla1a	Yes
Pla2g10	Yes
Pla2g12a	Yes
Pla2g12b	Yes
Pla2g15	Yes
Pla2g16	Yes
Pla2g1b	Yes
Pla2g2a	Yes
Pla2g2c	Yes
Pla2g2d	Yes
Pla2g2e	Yes
Pla2g2f	Yes
Pla2g3	Yes
Pla2g4a	Yes
Pla2g4b	Yes
Pla2g4c	Yes
Pla2g4d	Yes
Pla2g4e	Yes
Pla2g4f	No
Pla2g5	Yes
Pla2g6	Yes
Pla2g7	Yes
Plb1	Yes
Plbd1	Yes
Plbd2	Yes
Plcb1	Yes
Plcb2	Yes
Plcb3	Yes
Plcb4	Yes
Plcd1	Yes
Plcd3	Yes
Plcd4	Yes
Plce1	Yes
Plcg1	Yes
Plcg2	Yes
Plch1	Yes
Plch2	No
Plcl1	Yes
Plcl2	Yes
Plcxd1	Yes
Plcxd2	Yes
Plcxd3	Yes
Plcz1	Yes
Pld1	Yes
Pld2	Yes
Pld3	Yes
Pld4	Yes
Pld5	Yes
Pld6	Yes
Pon1	Yes
Pon2	Yes
Pon3	Yes
Prss1	Yes
Prss12	Yes
Prss16	No
Prss2	Yes
Prss21	Yes
Prss22	Yes
Prss23	Yes
Prss27	Yes
Prss29	Yes
Prss3	Yes
Prss30	No
Prss32	Yes
Prss33	No
Prss34	Yes
Prss35	Yes
Prss36	Yes
Prss37	Yes
Prss38	Yes
Prss39	No
Prss40	No
Prss41	Yes
Prss42	Yes
Prss44	Yes
Prss45	Yes
Prss46	Yes
Prss47	Yes
Prss48	No
Prss50	No
Prss53	Yes
Prss54	Yes
Prss55	No
Prss56	No
Prss57	Yes
Prss58	Yes
Prss8	Yes
Slc10a1	Yes
Slc10a2	Yes
Slc15a1	Yes
Slc15a2	Yes
Slc16a1	Yes
Slc16a3	Yes
Slc16a5	No
Slc16a6	Yes
Slc21a4	Yes
Slc22a1	Yes
Slc22a12	Yes
Slc22a2	Yes
Slc22a25	Yes
Slc22a4	Yes
Slc22a5	Yes
Slc22a6	Yes
Slc22a7	Yes
Slc22a8	Yes
Slc28a1	Yes
Slc28a2	Yes
Slc28a3	Yes
Slc29a1	Yes
Slc29a2	Yes
Slc47a1	Yes
Slc47a2	Yes
Slc5a6	Yes
Slc7a5	Yes
Slco1a1	Yes
Slco1a2	No
Slco1a5	Yes
Slco1b2	No
Slco1c1	Yes
Slco2a1	Yes
Slco2b1	Yes
Slco3a1	Yes
slco4a1	Yes
slco4c1	Yes
Sult1a1	Yes
Sult1c3	Yes
Sult1e1	Yes
Sult2a1	Yes
Tymp	Yes
Ugt1a1	Yes
Ugt1a2	Yes
Ugt1a3	No
Ugt1a6	Yes
Ugt1a8	No
Ugt1a9	No
Ugt2b	Yes
Ugt2b1	Yes
Ugt2b15	Yes
Ugt2b17	Yes
Ugt2b7	Yes
Upb1	Yes
xdh	Yes
